# Supplementary material
Source: publisher figshare collection journal article supplement (https://brill.figshare.com/ndownloader/files/26518088)
Supplement: Supplementary file 1 [file 26518088]

terminal	PSL	SW	rel_trunk	npsv	group	age	references
Celtedens_ibericus	88	18	4.888888889	22	alb	Albian	McGowan and Evans 1995; McGowan 2002
Brachycormus_noachicus	156.7	87.6	1.788812785	12	caud	Aquitanian	Rocek 1996, fig. 6B
Seminobatrachus_boltyschkensis	390.1	176.1	2.215218626	15	caud	Ypresian	Skutschas & Gubin 2012
Eurycea_rathbuni	669.4	233.9	2.861906798	14	caud	Holocene	digimorph TNHC 51176
Valdotriton_gracilis	234.3	76.9	3.046814044	16	caud	Albian	Evans and Milner 1996
Ambystoma_tigrinum	136	42.7	3.18501171	16	caud	Holocene	MNHN-ZA-AC 1875_369
Taricha_torosa	105.7	30.4	3.476973684	13	caud	Holocene	digimorph
Andrias_japonicus	851.9	215	3.962325581	20	caud	Holocene	M_sch 1887
Hylaeobatrachus_croyii	438.7	109.1	4.021081577	16	caud	Barremian	Wang & Rose 2005; Dollo 1884
Eurycea_waterlooensis	724.3	175	4.138857143	14	caud	Holocene	digimorph
Cryptobranchus_alleganiensis	294.6	65.29	4.512176	19	caud	Holocene	UCLGMZ-W16
Eurycea_sosorum	530.2	98.1	5.404689093	17	caud	Holocene	digimorph
Triturus_cristatus	1142.9	171.1	6.679719462	16	caud	Holocene	MNHN-ZA-AC A6079; Lanza et al. 2010
Proteus_anguinus	745.7	61.8	12.06634304	31	caud	Holocene	Lanza et al. 2010, 30 PSV in rough illustration from Configliachi & Rusconi 1821
Batrachuperus_persicus	NA	NA	NA	18	caud	Holocene	Lanza et al. 2010
Calotriton_asper	NA	NA	NA	15	caud	Holocene	Lanza et al. 2010
Chioglossa_lusitanica	NA	NA	NA	14	caud	Holocene	Lanza et al. 2010
Desmognathus_fuscus	NA	NA	NA	16	caud	Holocene	Boisvert 2009
Desmognathus_ochrophaeus	NA	NA	NA	15	caud	Holocene	Boisvert 2009
Dicamptodon_ensatus	NA	NA	NA	15	caud	Holocene	Boisvert 2009
Euproctus_montanus	NA	NA	NA	14	caud	Holocene	Lanza et al. 2010
Euproctus_platycephalus	NA	NA	NA	15	caud	Holocene	Lanza et al. 2010
Eurycea_bislineata	NA	NA	NA	17	caud	Holocene	Boisvert 2009
Gyrinophilus_porphyriticus	NA	NA	NA	19	caud	Holocene	Boisvert 2009
Lissotrion_vulgaris_graecus	NA	NA	NA	14	caud	Holocene	Lanza et al. 2010
Lissotriton_boscai	NA	NA	NA	13	caud	Holocene	Lanza et al. 2010
Lissotriton_helveticus	NA	NA	NA	13	caud	Holocene	Lanza et al. 2010
Lissotriton_italicus	NA	NA	NA	13	caud	Holocene	Lanza et al. 2010
Lissotriton_montandoni	NA	NA	NA	13	caud	Holocene	Lanza et al. 2010
Lissotriton_vulgaris_ampelensis	NA	NA	NA	14	caud	Holocene	Lanza et al. 2010
Lissotriton_vulgaris_kosswigi	NA	NA	NA	13	caud	Holocene	Lanza et al. 2010
Lissotriton_vulgaris_meridionalis	NA	NA	NA	13	caud	Holocene	Lanza et al. 2010
Lyciasalamandra_atifi	NA	NA	NA	17	caud	Holocene	Lanza et al. 2010
Lyciasalamandra_billae	NA	NA	NA	17	caud	Holocene	Lanza et al. 2010
Lyciasalamandra_fazilae	NA	NA	NA	17	caud	Holocene	Lanza et al. 2010
Lyciasalamandra_flavimembris	NA	NA	NA	17	caud	Holocene	Lanza et al. 2010
Lyciasalamandra_helverseni	NA	NA	NA	17	caud	Holocene	Lanza et al. 2010
Lyciasalamandra_luschani_luschani	NA	NA	NA	17	caud	Holocene	Lanza et al. 2010
Mertensiella_caucasica	NA	NA	NA	16	caud	Holocene	Lanza et al. 2010
Mesotriton_alpestris_alpestris	NA	NA	NA	13	caud	Holocene	Lanza et al. 2010
Mesotriton_alpestris_apuanus	NA	NA	NA	13	caud	Holocene	Lanza et al. 2010
Mesotriton_alpestris_cyreni	NA	NA	NA	13	caud	Holocene	Lanza et al. 2010
Mesotriton_alpestris_inexpectatus	NA	NA	NA	13	caud	Holocene	Lanza et al. 2010
Mesotriton_alpestris_serdarus	NA	NA	NA	13	caud	Holocene	Lanza et al. 2010
Mesotriton_alpestris_veluchiensis	NA	NA	NA	14	caud	Holocene	Lanza et al. 2010
Necturus_alabamensis	NA	NA	NA	19	caud	Holocene	Boisvert 2009
Necturus_maculosus	NA	NA	NA	19	caud	Holocene	Boisvert 2009
Neurergus_crocatus	NA	NA	NA	14	caud	Holocene	Lanza et al. 2010
Neurergus_kaiseri	NA	NA	NA	14	caud	Holocene	Lanza et al. 2010
Neurergus_microspilotus	NA	NA	NA	14	caud	Holocene	Lanza et al. 2010
Neurergus_strauchii_barani	NA	NA	NA	14	caud	Holocene	Lanza et al. 2010
Neurergus_strauchii_strauchii	NA	NA	NA	14	caud	Holocene	Lanza et al. 2010
Notophtalmus_viridescens	NA	NA	NA	15	caud	Holocene	Boisvert 2009
Ommatotriton_ophryticus_ophryticus	NA	NA	NA	14	caud	Holocene	Lanza et al. 2010
Ommatotriton_vittatus	NA	NA	NA	13	caud	Holocene	Lanza et al. 2010
Onychodactylus_fischeri	NA	NA	NA	20	caud	Holocene	Litvinchuk & Borkin 2003
Paleoamphiuma_tetradactylum	NA	NA	NA	35	caud	Ypresian	Rieppel and Grande 1998
Plethodon_cinereus	NA	NA	NA	22	caud	Holocene	Boisvert 2009
Pleurodeles_nebulosus	NA	NA	NA	14	caud	Holocene	Lanza et al. 2010
Pleurodeles_poireti	NA	NA	NA	14	caud	Holocene	Lanza et al. 2010
Pleurodeles_walti	NA	NA	NA	15	caud	Holocene	Lanza et al. 2010
Proteus_anguinus_anguinus	NA	NA	NA	31	caud	Holocene	Lanza et al. 2010, 30 PSV in rough illustration from Configliachi & Rusconi 1821
Proteus_anguinus_parkelj	NA	NA	NA	35	caud	Holocene	Lanza et al. 2010
Pseudobranchus_striatus	NA	NA	NA	37	caud	Holocene	Boisvert 2009
Pseudotriton_ruber	NA	NA	NA	18	caud	Holocene	Baur 1897
Ranodon_sibiricus	NA	NA	NA	15	caud	Holocene	Litvinchuk & Borkin 2003
Ranodon_tsinpaensis	NA	NA	NA	19	caud	Holocene	Boisvert 2009
Rhyacotriton_olympicus	NA	NA	NA	16	caud	Holocene	Boisvert 2009
Salamandra_algira	NA	NA	NA	16	caud	Holocene	Lanza et al. 2010
Salamandra_atra_atra	NA	NA	NA	15	caud	Holocene	Lanza et al. 2010
Salamandra_atra_aurorae	NA	NA	NA	16	caud	Holocene	Lanza et al. 2010
Salamandra_atra_pasubiensis	NA	NA	NA	15	caud	Holocene	Lanza et al. 2010
Salamandra_atra_prenjensis	NA	NA	NA	15	caud	Holocene	Lanza et al. 2010
Salamandra_corsica	NA	NA	NA	15	caud	Holocene	Lanza et al. 2010
Salamandra_infraimmaculata_infraimmaculata	NA	NA	NA	16	caud	Holocene	Lanza et al. 2010
Salamandra_infraimmaculata_orientalis	NA	NA	NA	16	caud	Holocene	Lanza et al. 2010
Salamandra_infraimmaculata_semenovi	NA	NA	NA	17	caud	Holocene	Lanza et al. 2010
Salamandra_lanzai	NA	NA	NA	15	caud	Holocene	Lanza et al. 2010
Salamandra_salamandra_almanzoris	NA	NA	NA	15	caud	Holocene	Lanza et al. 2010
Salamandra_salamandra_bejarae	NA	NA	NA	15	caud	Holocene	Lanza et al. 2010
Salamandra_salamandra_bernardezi	NA	NA	NA	16	caud	Holocene	Lanza et al. 2010
Salamandra_salamandra_europea	NA	NA	NA	15	caud	Holocene	Lanza et al. 2010
Salamandra_salamandra_fastuosa	NA	NA	NA	15	caud	Holocene	Lanza et al. 2010
Salamandra_salamandra_gallaica	NA	NA	NA	16	caud	Holocene	Lanza et al. 2010
Salamandra_salamandra_gigliolii	NA	NA	NA	16	caud	Holocene	Lanza et al. 2010
Salamandra_salamandra_salamandra	NA	NA	NA	15	caud	Holocene	Lanza et al. 2010
Salamandrella_keyserlingii	NA	NA	NA	18	caud	Holocene	Lanza et al. 2010
Salamandrina_perspicillata	NA	NA	NA	14	caud	Holocene	Lanza et al. 2010
Salamandrina_terdigitata	NA	NA	NA	14	caud	Holocene	Lanza et al. 2010
Siren_lacertina	NA	NA	NA	40	caud	Holocene	Boisvert 2009
Speleomantes_ambrosii_ambrosii	NA	NA	NA	14	caud	Holocene	Lanza et al. 2010
Speleomantes_ambrosii_bianchi	NA	NA	NA	14	caud	Holocene	Lanza et al. 2010
Speleomantes_flavus	NA	NA	NA	14	caud	Holocene	Lanza et al. 2010
Speleomantes_genei	NA	NA	NA	14	caud	Holocene	Lanza et al. 2010
Speleomantes_imperialis_imperialis	NA	NA	NA	14	caud	Holocene	Lanza et al. 2010
Speleomantes_imperialis_sarrabusensis	NA	NA	NA	14	caud	Holocene	Lanza et al. 2010
Speleomantes_italicus	NA	NA	NA	14	caud	Holocene	Lanza et al. 2010
Speleomantes_strinatii	NA	NA	NA	14	caud	Holocene	Lanza et al. 2010
Speleomantes_supramontis	NA	NA	NA	14	caud	Holocene	Lanza et al. 2010
Taricha_granulosa	NA	NA	NA	13	caud	Holocene	Boisvert 2009
Triturus_carnifex_carnifex	NA	NA	NA	15	caud	Holocene	Lanza et al. 2010
Triturus_dobrogicus	NA	NA	NA	18	caud	Holocene	Lanza et al. 2010
Triturus_karelinii	NA	NA	NA	14	caud	Holocene	Lanza et al. 2010
Triturus_marmoratus	NA	NA	NA	13	caud	Holocene	Lanza et al. 2010
Triturus_pygmaeus	NA	NA	NA	13	caud	Holocene	Lanza et al. 2010
Triturus_vittatus	NA	NA	NA	14	caud	Holocene	Litvinchuk et al. 2005
Dermophis_mexicanus	NA	NA	NA	105	gym	Holocene	Wake 1980
Eocaecilia_micropodia	NA	NA	NA	42	gym	Toarcian	Jenkins and Walsh 1998
Karaurus_sharovi	970.13	743.79	1.304306323	12.5	jcaud	Berriasian	Marjanovic and Laurin 2008; E.A. pers. obs. on casts
Beiyanerpeton_jianpingense	367.27	220.86	1.66290863	15	jcaud	Oxfordian	Gao & Shubin 2012; the skeleton is slightly distorted (skewed), but it doesn't seem to affect significantly the relevant measurements.
Sinerpeton_fengshanense	243.19	121.23	2.006021612	16.5	jcaud	Aptian	Gao and Shubin 2001
Chunerpeton_tianyiense	433.78	198.71	2.182980222	15	jcaud	Barremian	Gao & Shubin 2003
Pangerpeton_sinense	294.83	130.05	2.267051134	14	jcaud	Barremian	Wang et al. 2006
Jeholotriton_paradoxus	50	22	2.272727273	15.5	jcaud	Callovian	Wang & Rose 2005, reconstruction fig. 6
Liaoxitriton_daohugouensis	173.77	64.22	2.705854874	15.5	jcaud	Callovian	Wang 2004
Laccotriton_subsolanus	263.27	96.36	2.73215027	16	jcaud	Tithonian	Wang & Rose 2005
Iridotriton_hechti	NA	NA	NA	17	jcaud	Kimmeridgian	Evans et al. 2005
Diplocaulus	959.1	992.6	0.966250252	17	lepo	Artinskian	Douthitt 1917
Hyloplesion_longicostatum	510	136.5	3.736263736	30	lepo	Moscovian	Carroll and Gaskill 1978
Batropetes_niederkirchensis	203.1	54	3.761111111	19	lepo	Asselian	Glienke 2013
Microbrachis	710	159.7	4.445835942	38	lepo	Moscovian	Carroll and Gaskill 1978, age from Vallin & Laurin 2004
cf_Micraroter	35.2	6.235294118	5.645283019	32	lepo	Kungurian	Carroll and Gaskill 1978, based on table 2 and fig. 57
Cardiocephalus_peabodyi	10.1	1.461538462	6.910526316	37	lepo	Artinskian	Carroll and Gaskill 1978, using table 2 and fig. 32
Batropetes_fritschi	NA	NA	NA	17	lepo	Sakmarian	Glienke 2013
Brachydectes_elongatus	NA	NA	NA	97	lepo	Kungurian	Wellstead 1991 p. 25
Brachydectes_newberryi	NA	NA	NA	69	lepo	Moscovian	Wellstead 1991 p. 25
Rhynchonkos_stovalli	NA	NA	NA	37	lepo	Kungurian	Carroll and Gaskill 1978, NPSV is the estimated minimum
Ceratophrys_aurita	381.8	801.6	0.476297405	8	sal	Holocene	MNHN-ZA-AC
Neusibatrachus_wilferti	43.6	79.4	0.549118388	9	sal	Hauterivian	B�ez & Sanchiz 2007
Haddadus_binotatus	171.2	266.4	0.642642643	8	sal	Holocene	digimorph
Leiopelma_hochstetteri	156.2	242.5	0.644123711	9	sal	Holocene	digimorph
Eleutherodactylus_gossei	6.95	10.41	0.667627281	8	sal	Holocene	digimorph
Arariphrynus_placidoi	54.7	79.7	0.686323714	8	sal	Aptian	Baez et al. 2009
Gobiates	66	94.6	0.697674419	8	sal	Coniacian	Rocek 2008
Ischnocnema_guentheri	144.4	204.7	0.70542257	8	sal	Holocene	digimorph
Pristimantis_pulvinatus	212.1	296	0.716554054	8	sal	Holocene	digimorph
Eoxenopoides_reuningi	22.8	30.3	0.752475248	6	sal	Danian	Estes 1977
Ceuthomantis_smaragdinus	6.21	8.25	0.752727273	8	sal	Holocene	digimorph
Philautus_femoralis	398	522	0.762452107	8	sal	Holocene	digimorph
Theloderma_stellatum	376	485.2	0.77493817	8	sal	Holocene	digimorph
Nyctixalus_pictus	355	444.1	0.799369511	8	sal	Holocene	digimorph
Incilius_periglenes	162	197.7	0.819423369	8	sal	Holocene	digimorph
Liaobatrachus_grabaui	73	88.9	0.821147357	9	sal	Barremian	Dong et al. 2013
Polypedates_leucomystax	393.8	478.2	0.82350481	8	sal	Holocene	digimorph
Rhacophorus_reinwardtii	381.1	459.4	0.829560296	8	sal	Holocene	digimorph
Polypedates_eques	413.4	475	0.870315789	8	sal	Holocene	digimorph
Polypedates_cruciger	414.6	475.6	0.871740959	8	sal	Holocene	digimorph
Notobatrachus_degiustoi	53.4	61	0.875409836	9	sal	Kimmeridgian	B�ez & Basso 1996
Buergeria_oxycephalus	14.67	16.7	0.878443114	8	sal	Holocene	digimorph
Ascaphus_truei	35.1	39.8	0.881909548	9	sal	Holocene	digimorph
Philautus_signatus	370	419.2	0.882633588	8	sal	Holocene	digimorph
Acris_crepitans	12.36	13.74	0.899563319	8	sal	Holocene	Maglia et al. 2007
Pipa_pipa	444.9	488.8	0.910188216	8	sal	Holocene	MNHN-ZA-AC 1888_103
Hamptophryne_boliviana	257	262	0.980916031	8	sal	Holocene	digimorph
Bufo_bufo	427	428.9	0.995570063	8	sal	Holocene	MNHN-ZA-AC
Gastrophryne_usta	297.7	292.5	1.017777778	8	sal	Holocene	digimorph
Hyla_trachycephalus	487	459.7	1.059386556	8	sal	Holocene	MNHN-ZA-AC
Chiromantis_rufescens	15.07	12.9	1.168217054	8	sal	Holocene	digimorph
Vieraella_herbstii	73.7	57.5	1.28173913	9.5	sal	Bajocian	B�ez & Basso 1996
Triadobatrachus_massinoti	57.788	33.78	1.7107164	15	sal	Olenekian	This study
Rhadinosteus_parvus	NA	NA	NA	8	sal	Kimmeridgian	Henrici 1998
Bombina_orientalis	NA	NA	NA	8	sal	Holocene	Maglia & P�gener 1998
Ceratophrys_cornuta	NA	NA	NA	8	sal	Holocene	Wild 1997
Discoglossus_sardus	NA	NA	NA	8	sal	Holocene	Pugener & Maglia 1997
Hymenochirus_curtipes	NA	NA	NA	6	sal	Holocene	P�gener 2002
Pelobates_cultripes	1176.187	1374.265	0.855866227	8	sal	Holocene	Adolphi 1895
Rana_dalmatina	NA	NA	NA	8	sal	Holocene	Rockova & Rocek 2005
Xenopus_laevis	NA	NA	NA	8	sal	Holocene	Trueb & Hanken 1992p. 20
Apateon_pedestris	484	308	1.571428571	17.5	tem	Asselian	Schoch and Milner 2008, fig. 2. I am adding one presacral because the atlas is not depicted in the reconstruction
Gerobatrachus_hottoni	114.1	69.4	1.644092219	17	tem	Kungurian	Anderson et al. 2008
Micropholis_stowi	287	165.1	1.7383404	17	tem	Induan	Schoch & Rubidge 2005, fig. 7 (reconstruction)
Amphibamus_grandiceps	1075	561	1.916221034	20.5	tem	Moscovian	Carroll 2007, fig.1A
Micromelerpeton_credneri	291.7	121	2.410743802	29	tem	Asselian	Carroll 2007, can presacral number may be inaccurate
Doleserpeton_annectens	34.55172414	13.37142857	2.583996463	24	tem	Kungurian	Sigurdsen and Bolt 2010, from dorsal skull and full lateral reconstructions
Balanerpeton_woodi	250	85.9	2.910360885	24	tem	Visean	Milner & Sequeira 1993
Platyrhinops_lyelli	NA	NA	NA	25.5	tem	Moscovian	Clack & Milner 2209
Cacops_aspidephorus	NA	NA	NA	21	tem	Kungurian	Dilkes and Brwon 2007
Eryops_megacephalus	NA	NA	NA	22	tem	Gzhelian	Moulton 1974
